# Supplementary material
Source: MDPI journal article supplement (https://www.mdpi.com/2071-1050/14/15/9252)
Supplement: s1 [file s1 › sustainability-1822773-supplementary.pdf]

## Supplementary Material

### S1. MSW collection and transport

Data on the collection and transportation of MSW for Lagos and Abuja were obtained from the staff of the LAWMA and the AEPB. Tables S.1 gives the input and output data used for the collection and transportation of 1t of MSW in Lagos and Abuja. The diesel consumption (L/t) is given along with the emission factors (g/L) and the emissions from the diesel combustion during the waste collection and transportation which is calculated using the equation (S1):

$$\text{Emissions (kg/L)} = \text{Diesel Fuel Used (L/t)} \times \text{Emission Factor (Kg/L)} \quad (S1)$$

**Table S1.** Emission from MSW collect and transportation

| Diesel Consumption for MSW Collection and Transportation (L/t) | Emissions               | Emission Factors (Kg/L) (Babu et al 2014) | Emission (Kg/t) |
|----------------------------------------------------------------|-------------------------|-------------------------------------------|-----------------|
| 8.8                                                            | CO <sub>2</sub>         | 2.663                                     | 23.4344         |
|                                                                | CO                      | 0.01195                                   | 0.10516         |
|                                                                | Hydrocarbons (HC)       | 0.00175                                   | 0.0154          |
|                                                                | NO <sub>x</sub>         | 0.00236                                   | 0.020768        |
|                                                                | Particulate Matter (PM) | 0.00062                                   | 0.005456        |

### S2 Electricity Output from WtE systems

Values for the electricity output generated from the WtE systems, were derived from equation S2:

$$E_p = \frac{M_i \times CV \times \eta}{Co} \quad (S2)$$

From equation S2  $M_i$  refers to the amount/volume of waste fraction involved in tonnes (t) or cubic metres (m<sup>3</sup>), CV is the calorific value for respective technologies (Incineration: 19.34 MJ/Kg waste processed (Abuja), 20.56 MJ/Kg waste processed (Lagos); AD: 37.2MJ/m<sup>3</sup>; Gasification: 15.68 MJ/Kg waste processed (Abuja), 14.37 MJ/Kg waste processed (Lagos),  $\eta$  is conversion efficiency (Incineration: 20%; AD:26%; Gasification:23% and LFGTE:33%) , and Co is the conversion factor (3.6) for MJ to kWh.

### S3 Emission Calculation for the WtE systems

*Landfill:* the emissions in a landfill can be attributed to the degradation of the organic matter and diesel requirements by vehicles used in the compaction of the wastes. To quantify the amounts of CH<sub>4</sub> and CO<sub>2</sub> produced by the landfill, the Intergovernmental Panel on Climate Change (IPCC) Tier I methodology (IPCC, 2006) was adopted which is based upon a mass balance approach, as indicated in equations (S3) and (S4) below:

$$CH_4 \text{ (kg /tonne of MSW)} = W_F \times MCF \times DOC \times DOC_F \times F \times \left( \frac{16}{12} - R \right) \times (1 - OX) \quad (S3)$$

$$CO_2 \text{ (kg /tonne of MSW)} = CH_4 \times \left( \frac{1-F}{F} - OX \right) \times \frac{44}{16} \quad (S4)$$

where  $W_F$  is the wet weight of the MSW disposed at the landfill. The MCF refers to the methane correction factor and ranges between 0.4 and 1 for unmanaged and well managed landfills (Lee et al.,2017). A value of 0.6 was adopted because the landfills in most developing countries may not be perfectly managed. DOC is the percentage of the degradable organic carbon in the waste, and  $DOC_F$  is the fraction of the degradable carbon that converts to landfill gas through waste decomposition. In the

study area, the DOC of the landfilled waste comprises food, paper, and textile waste. The value 16/12 is the carbon content of methane, F refers to the methane concentration in landfill gas, R is the recovered methane fraction, and OX is the methane oxidation factor. It has been assumed that 50% of landfill gas is collected (i.e. R = 0.5) and used to generate electricity; the rest escapes into the atmosphere and contributes to GHG emissions (Sharma and Chandel, 2017). The amount of diesel fuel consumed during the compaction process of the wastes is taken as 3 L/t of MSW after Babu et al. (2014). The assumption of this calculation is that the whole amount of the degradation occurs instantaneously and that there is a steady state of continuous addition of waste to the site resulting to a steady state in terms of LFG produced.

**Table S2.** Emission from LFGTE per tonne of MSW for Abuja and Lagos.

| <b>Air Emissions<br/>(Kg/t of waste processed )</b> | <b>Abuja</b> | <b>Lagos</b> |
|-----------------------------------------------------|--------------|--------------|
| CO <sub>2</sub> , biogenic                          | 122.2        | 143.1        |
| CH <sub>4</sub>                                     | 44.7         | 52.1         |

AD: the emissions of CH<sub>4</sub> and CO<sub>2</sub> from AD were calculated using the Bussell equation (Odedina et al., 2017) given in equation (S5). Using elemental analysis, the chemical formula for the biodegradable fraction of MSW was formed based on the respective MSW composition of the two cities. It was assumed that 5% of biogas generated during AD would leak into the atmosphere (Richard et al., 2021). Hence, only 95% of CH<sub>4</sub> was assumed to be combusted to CO<sub>2</sub> in the energy generation. The emission of SO<sub>2</sub> and NO<sub>x</sub> were taken as 22 mg SO<sub>2</sub> Nm<sup>-3</sup> and 1170 mg NO<sub>x</sub> Nm<sup>-3</sup> of biogas burned after Sharma and Chandel (2017).

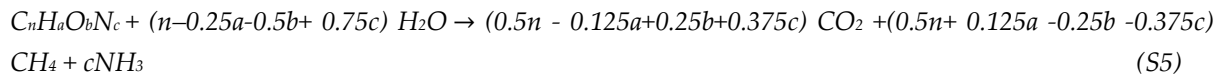

where 'n', 'a', 'b' and c, are constants whose values can be determined by using the normalised mole ratio proposed by Salami et al. (2011). This was obtained as follows:

$$Mole\ Ratio = \frac{K[C,H,O,N]}{M[C,H,O,N]} \quad (S6)$$

where K is the mass of the Carbon (C), Hydrogen (H), Oxygen (O) and Nitrogen (N), and M is their respective Molar Mass in kg.

*Incineration:* the air emissions of gases such as CO<sub>2</sub>, CO, dinitrogen monoxide (N<sub>2</sub>O), ammonia (NH<sub>3</sub>), NO<sub>x</sub> and non-methane volatile compounds (NMVOC) were calculated by using equations based on the IPCC methodology as given below, based on the concentration of gases and exhaust gas volume (5500 m<sup>3</sup>/t) (IPCC, 2006). It was assumed that a wet scrubber with 95% removal efficiency would be used for SO<sub>x</sub> removal from the incinerator (Chien and Chu, 2000). During the incineration process, both biogenic CO<sub>2</sub> and fossil CO<sub>2</sub> will be generated (Chan and Lin, 2010). According to the IPCC methodology, the biogenic CO<sub>2</sub> and fossil CO<sub>2</sub> constitute 67 and 33% of CO<sub>2</sub> emitted, respectively (IPCC, 2006). Equation (S7) is used to calculate the CO<sub>2</sub> emissions for incineration:

$$CO_2\ Emissions = \sum MSW_{F(i)} \times C_i \times O_F \times \frac{44}{12} \quad (S7)$$

where MSW<sub>F(i)</sub> refers to the combustible portion (i = plastics, papers and textiles) of the MSW C<sub>i</sub> is the carbon content of each combustible portion, and O<sub>F</sub> is the oxidation fraction (0.98). At the same time,

$\frac{44}{12}$  is the carbon content of CO<sub>2</sub>. The emissions for CO, N<sub>2</sub>O, NH<sub>3</sub>, NO<sub>x</sub> and NMVOC were calculated by using equations below where the values 50mg/m<sup>3</sup>, 2 mg/m<sup>3</sup>, 4 mg/m<sup>3</sup>, 200 mg/m<sup>3</sup> and 5 mg/m<sup>3</sup> are the respective emission factors as given by IPCC :

$$N_2O \text{ Emissions} = 2 \text{ mg/m}^3 \times 5500 \text{ m}^3/\text{t} \times MSW_F \quad (S8)$$

$$CO \text{ Emissions} = 50 \text{ mg/m}^3 \times 5500 \text{ m}^3/\text{t} \times MSW_F \quad (S9)$$

$$NO_x \text{ Emissions} = 200 \text{ mg/m}^3 \times 5500 \text{ m}^3/\text{t} \times MSW_F \quad (S10)$$

$$NH_3 \text{ Emissions} = 4 \text{ mg/m}^3 \times 5500 \text{ m}^3/\text{t} \times MSW_F \quad (S11)$$

$$NMVOC \text{ Emissions} = 5 \text{ mg/m}^3 \times 5500 \text{ m}^3/\text{t} \times MSW_F \quad (S12)$$

**Table S3.** Emission from Incineration per tonne of waste processed for Abuja and Lagos

| Air Emissions (Kg/t waste processed ) | Abuja  | Lagos  |
|---------------------------------------|--------|--------|
| CO <sub>2</sub> , biogenic            | 519.3  | 604.2  |
| CO <sub>2</sub> , fossil              | 255.8  | 297.6  |
| CO                                    | 0.11   | 0.13   |
| N <sub>2</sub> O                      | 0.0045 | 0.0053 |
| NO <sub>x</sub>                       | 0.45   | 0.53   |
| NH <sub>3</sub>                       | 0.009  | 0.011  |
| NMVOC                                 | 0.011  | 0.013  |

Gasification: In the LCA model of gasification, the life cycle inventory of the LCA model has been made primarily based on the literature, report, and publications, in this case from Defra, 2013. Thus the emissions for this WtE calculated using equation (13):

$$Emissions \text{ (kg/t)} = \text{Amount of Waste (Kg/t waste processed)} \times \text{Emission Factors} \quad (S13)$$

**Table S4.** Emission factors for Gasification (Derfa,2013).

| Emissions                        | Emission Factor |
|----------------------------------|-----------------|
| CO <sub>2</sub> , biogenic       | 0.67            |
| CO <sub>2</sub> , fossil         | 0.33            |
| NO <sub>x</sub>                  | 0.78            |
| SO <sub>x</sub>                  | 0.052           |
| Hydrogen Chloride (HCl)          | 0.032           |
| Mercury (Hg)                     | 0.000069        |
| Arsenic (Ar)                     | 0.00006         |
| Nickel (Ni)                      | 0.00004         |
| Cadmium (Cd)                     | 0.0000069       |
| Volatile Organic Compounds (VOC) | 0.011           |
| Hydrogen Fluoride (HF)           | 0.00034         |

**Table S5.** Emission from Gasification per tonne of waste processed for Abuja and Lagos (after Defra,2013).

| <b>Air Emissions<br/>(Kg/t waste processed )</b> | <b>Abuja</b> | <b>Lagos</b> |
|--------------------------------------------------|--------------|--------------|
| CO <sub>2</sub> , biogenic                       | 589.6        | 629.8        |
| CO <sub>2</sub> , fossil                         | 290.4        | 310.2        |
| NO <sub>x</sub>                                  | 0.67         | 0.73         |
| SO <sub>x</sub>                                  | 0.046        | 0.05         |
| HCl                                              | 0.028        | 0.03         |
| Hg                                               | 0.00006      | 0.00007      |
| Ar                                               | 0.00005      | 0.00006      |
| Ni                                               | 0.000035     | 0.00004      |
| Cd                                               | 0.000006     | 0.000007     |
| VOC                                              | 0.0097       | 0.01         |
| HF                                               | 0.00029      | 0.0003       |

#### S4. Consumptions and emissions of backup generators

The emissions from diesel consumption for backup generators can be obtained using the equations (2) and (3) with the diesel consumption (L/kWh) emission factors (kg/L) as well as the results given below in Tables (4) and (5) respectively:

$$\text{CO}_2 \text{ Emissions (Kg/kWh)} = 0.865 \times \text{Density of Diesel Fuel (Kg/L)} \times \text{Diesel Fuel Consumption (L/kWh)} \times \frac{44}{12} \quad (S13)$$

where 0.865 is the amount of carbon in the diesel fuel with the density of diesel fuel being 0.85kg/L

$$\text{Emissions (Kg/kWh)} = \text{Diesel Fuel Consumption (L/kWh)} \times \text{Emission Factor (Kg/L)} \quad (S14)$$

**Table S6** The Diesel Consumption for diesel backup generators with the pollutants and emission factors (Jarkhrani, 2017 Adeniran, 2016).

| <b>Diesel Consumption for Back-Up Generators<br/>(L/kWh)</b> | <b>Pollutants</b>                  | <b>Emission Factors (Kg/L)</b> | <b>Emission (Kg/kWh)</b> |
|--------------------------------------------------------------|------------------------------------|--------------------------------|--------------------------|
| 0.32                                                         | Carbon Dioxide (CO <sub>2</sub> )  | 2.663                          | 0.85216                  |
|                                                              | Carbon Monoxide (CO)               | 0.01195                        | 0.003824                 |
|                                                              | HydroCarbons (HC)                  | 0.00175                        | 0.00056                  |
|                                                              | Nitrogen Oxides (NO <sub>x</sub> ) | 0.00236                        | 0.0007552                |
|                                                              | Particulate Matter (PM             | 0.00062                        | 0.0001984                |

#### S5. LCIA results for the full CML-1A impact assessment method

he National Grid electricity in the Abiotic Depletion category is due to the material consumption for the grid in the Ecoinvent dataset (the materiality of the systems is not fully reflected in the results for the DGBGs or WtE systems for which materiality data was not included).

#### S6. Main Drivers for the Impact Categories

Tables S 9 & 10 gives the main drivers in terms of substances and processes for each impact category for the WtE systems, DBGs and Grid Electricity

**Table S7.** LCIA results of the full range of impact categories for the WtE system, DBGs and Grid electricity per 1 kWh of electricity for Abuja [CML-1A Impact Assessment Method]

| Impact Category                  | Unit                                | AD Abuja    | Incineration Abuja | Gasification Abuja | LGTE Abuja  | DBGs        | Grid Electricity |
|----------------------------------|-------------------------------------|-------------|--------------------|--------------------|-------------|-------------|------------------|
| Abiotic depletion                | Kg Sb eq                            | 1.46E-08    | 1.08E-07           | 5.08E-07           | 1.54E-07    | 1.78E-07    | 1.02E-06         |
| Abiotic depletion (fossil fuels) | MJ                                  | 0.61820734  | 3.1653374          | 6.3956894          | 4.5873311   | 14.061615   | 8.6675592        |
| Global warming (GWP100a)         | Kg CO <sub>2</sub> eq               | 0.50676833  | 0.80435293         | 0.85750654         | 9.4962535   | 1.0250851   | 0.49665014       |
| Ozone layer depletion (ODP)      | Kg CFC-11 eq                        | 7.26E-09    | 3.40E-08           | 4.15E-08           | 4.96E-08    | 1.80E-07    | 2.53E-08         |
| Human toxicity                   | Kg 1,4-DB eq                        | 0.005480514 | 0.010225036        | 0.019499415        | 0.019035223 | 0.073157383 | 0.01172163       |
| Fresh water aquatic ecotox.      | Kg 1,4-DB eq                        | 0.031944614 | 0.000848937        | 0.001048333        | 0.001237647 | 0.004539814 | 0.000493882      |
| Marine aquatic ecotoxicity       | Kg 1,4-DB eq                        | 6.0802123   | 7.0422678          | 29.293482          | 10.235709   | 35.733645   | 8.5647179        |
| Terrestrial ecotoxicity          | Kg 1,4-DB eq                        | 0.008012232 | 9.97E-05           | 0.003090534        | 0.000142402 | 0.000240638 | 0.000753354      |
| Photochemical oxidation          | Kg C <sub>2</sub> H <sub>4</sub> eq | 0.000105956 | 3.96E-05           | 4.64E-05           | 0.002019335 | 0.000198027 | 4.06E-05         |
| Acidification                    | Kg SO <sub>2</sub> eq               | 0.000563639 | 0.00088947         | 0.000974193        | 0.002988768 | 0.012916254 | 0.000296188      |
| Eutrophication                   | Kg PO <sub>4</sub> eq               | 0.000143932 | 0.000191536        | 0.000209046        | 0.000717046 | 0.003134793 | 6.10E-05         |

**Table S8.** Life Cycle Characterisation Results of the full range of impact categories for the WtE system, DBGs and Grid electricity per 1 kWh of electricity for Lagos [CML-1A Impact Assessment Method]

| Impact Category                  | Unit                                | AD Lagos    | Incineration Lagos | Gasification Lagos | LFGTE Lagos | DBGs        | Grid Electricity |
|----------------------------------|-------------------------------------|-------------|--------------------|--------------------|-------------|-------------|------------------|
| Abiotic depletion                | Kg Sb eq                            | 1.41E-08    | 1.00E-07           | 5.54E-07           | 1.22E-07    | 1.78E-07    | 1.02E-06         |
| Abiotic depletion (fossil fuels) | MJ                                  | 0.60263408  | 2.8564213          | 6.9780682          | 3.6357096   | 14.061615   | 8.6675592        |
| Global warming (GWP100a)         | Kg CO <sub>2</sub> eq               | 0.50572088  | 0.74425049         | 0.93558938         | 8.7374896   | 1.0250851   | 0.49665014       |
| Ozone layer depletion (ODP)      | Kg CFC-11 eq                        | 7.09E-09    | 3.05E-08           | 4.53E-08           | 3.93E-08    | 1.80E-07    | 2.53E-08         |
| Human toxicity                   | Kg 1,4-DB eq                        | 0.005375593 | 0.009236046        | 0.021274993        | 0.015086451 | 0.073157383 | 0.011721636      |
| Fresh water aquatic ecotox.      | Kg 1,4-DB eq                        | 0.031211922 | 0.000759703        | 0.001143792        | 0.000980902 | 0.004539814 | 0.000493882      |
| Marine aquatic ecotoxicity       | Kg 1,4-DB eq                        | 5.9393909   | 6.3180494          | 31.960888          | 8.1123569   | 35.733645   | 8.5647179        |
| Terrestrial ecotoxicity          | Kg 1,4-DB eq                        | 0.00782836  | 9.17E-05           | 0.003371952        | 0.000112861 | 0.000240638 | 0.000753354      |
| Photochemical oxidation          | Kg C <sub>2</sub> H <sub>4</sub> eq | 0.000105803 | 3.57E-05           | 5.06E-05           | 0.001859974 | 0.000198027 | 4.06E-05         |
| Acidification                    | Kg SO <sub>2</sub> eq               | 0.000560105 | 0.000825291        | 0.001062901        | 0.002368761 | 0.012916254 | 0.000296188      |
| Eutrophication                   | Kg PO <sub>4</sub> - eq             | 0.000143075 | 0.000179078        | 0.000228081        | 0.000568298 | 0.003134793 | 6.10E-05         |

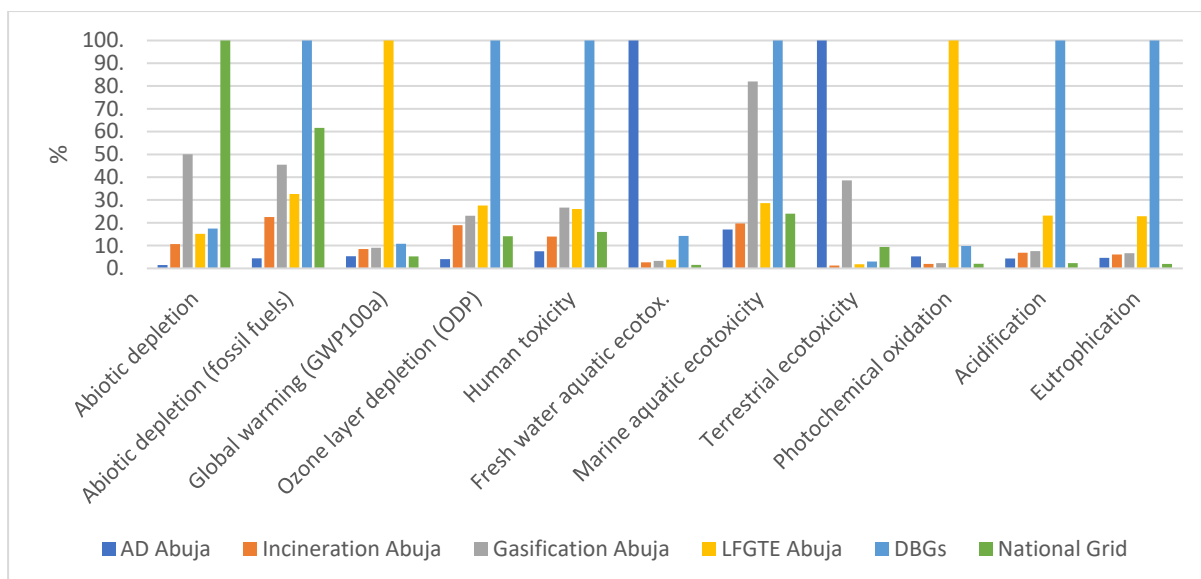

**Figure S1.** Abuja: Full LCA characterization results for 1kWh electricity output by WtE systems, DBG and national grid

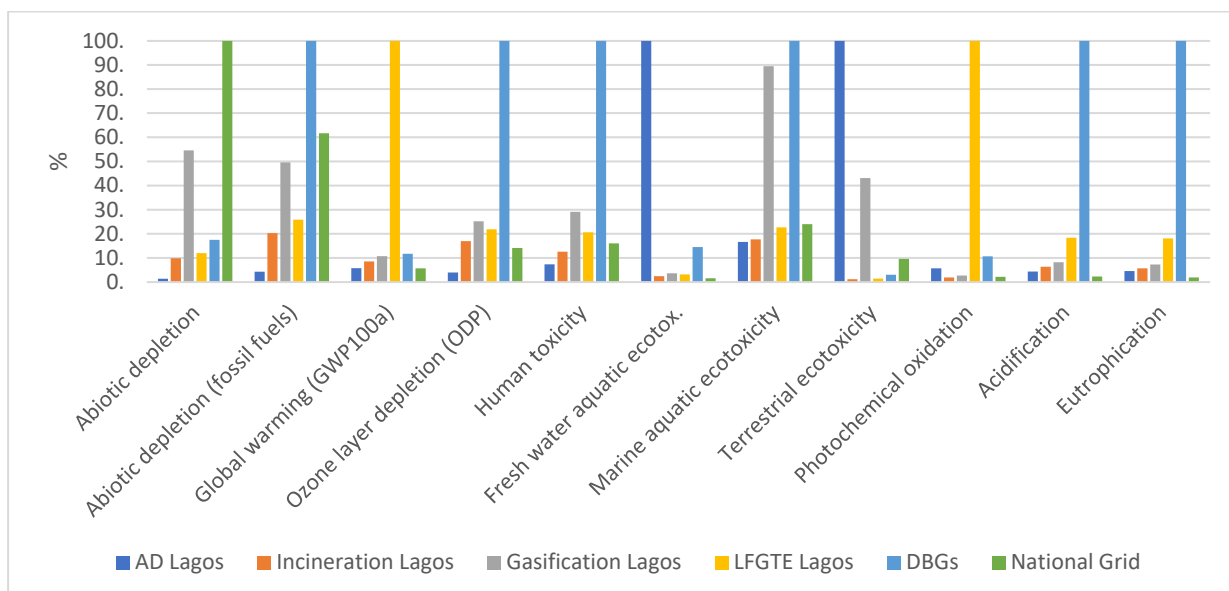

**Figure S2.** Lagos: Full LCA characterization results for 1kWh electricity output by WtE systems, DBG and national grid.

**Table S9** The Main Drivers (Substances) for the Impact Categories for WtE Systems, DGBs and Grid Electricity ( in %)

| Impact Category                               | AD                                       | Incineration                           | Gasification                           | LGTE                                     | DBGs                                   | Grid Electricity                        |
|-----------------------------------------------|------------------------------------------|----------------------------------------|----------------------------------------|------------------------------------------|----------------------------------------|-----------------------------------------|
| Abiotic Depletion Potential<br>(Fossil Fuels) | Crude Oil/Diesel<br>(85.5)               | Crude Oil/Diesel<br>(76)               | Natural Gas<br>(64.2)                  | Crude Oil/ Diesel<br>(76)                | Crude Oil/Diesel<br>(95.6)             | Natural Gas<br>(98.6)                   |
|                                               | air/CH <sub>4</sub> , biogenic<br>(91.3) | air/CO <sub>2</sub> , fossil<br>(99.1) | air/CO <sub>2</sub> , fossil<br>(98.2) | air/CH <sub>4</sub> , biogenic<br>(94.7) | air/CO <sub>2</sub> , fossil<br>(98.9) | air/CO <sub>2</sub> , fossil<br>(94.4)) |
| Global Warming Potential                      |                                          |                                        |                                        |                                          |                                        |                                         |
| Human Toxicity Potential                      | Soil/Cd (43.8)                           | air/Ni (36.4)                          | air/Ni (33.9)                          | air/NOx (33.8)                           | air/NOx (38.6)                         | air/Ni (26.6)                           |
| Photochemical Oxidation<br>Potential          | air/CH <sub>4</sub> , biogenic<br>(93.6) | air/CO,fossil<br>(52.4)                | air/CO,fossil<br>(46.6)                | air/CH <sub>4</sub> , biogenic<br>(96.1) | air/CO,fossil<br>(73.6)                | C <sub>2</sub> H <sub>6</sub><br>(29.2) |
| Acidification Potential                       | air/NOx (91.1)                           | air/NOx (72.5)                         | air/NOx (76.3)                         | air/NOx (89.7)                           | air/NOx (91.1)                         | air/NOx (69.9)                          |
| Eutrophication Potential                      | air/NOx (93.5)                           | air/NOx (87.5)                         | air/NOx (92.5)                         | air/NOx (97.2)                           | air/NOx (97.6)                         | air/NOx (88.2)                          |

**Table S10** The Main Drivers (Processes) for the Impact Categories for WtE Systems, DGBs and Grid Electricity (in 10%)

| Impact Category                               | AD                    | Incineration          | Gasification          | LGTE                    | DBGs                             | Grid Electricity                |
|-----------------------------------------------|-----------------------|-----------------------|-----------------------|-------------------------|----------------------------------|---------------------------------|
|                                               | Diesel                | Diesel                | Electricity           | Diesel                  | Diesel                           | Electricity                     |
| Abiotic Depletion Potential<br>(Fossil Fuels) | Consumption<br>(89.4) | Consumption<br>(79.4) | Consumption<br>(57.7) | Consumption<br>(59.4)   | Consumption<br>(100)             | Generation<br>(100)             |
|                                               | AD Process            | Incineration          | Gasification          | LFGTE Process           | Electricity                      | Electricity                     |
| Global Warming Potential                      | (91.3)                | Process (72.5)        | Process (53)          | (94.7)                  | Generation (100)                 | Generation (100)                |
|                                               |                       | Diesel                | Diesel                | Diesel                  | Diesel                           |                                 |
| Human Toxicity Potential                      | AD Process<br>(58.8)  | Consumption<br>(77.3) | Consumption<br>(37.3) | Consumption<br>(45.1)   | Consumption<br>(60.5)            | Electricity<br>Generation (100) |
|                                               |                       | Diesel                | Diesel                |                         |                                  |                                 |
| Photochemical Oxidation<br>Potential          | AD Process<br>(93.6)  | Consumption<br>(48.8) | Consumption<br>(38.3) | LFGTE Process<br>(96.1) | Electricity<br>Generation (70.9) | Electricity<br>Generation (100) |
|                                               | AD Process            | Incineration          | Gasification          | LFGTE Process           | Diesel Combustion                | Electricity                     |
| Acidification Potential                       | (87)                  | Process (61.1)        | Process (55.1)        | (84)                    | (89)                             | Generation (100)                |
|                                               | AD Process            | Incineration          | Gasification          | LFGTE Process           | Electricity                      | Electricity                     |
| Eutrophication Potential                      | (92.9)                | Process (74.5)        | Process (66.8)        | (91.1)                  | Generation (95.4)                | Generation (100)                |

## S7 Calculation of Total Electricity Supply for Abuja and Lagos

The results of the additional electricity from AD and total electricity for Abuja and Lagos with as the baseline year 2022 are calculated using the equations (15-17) below:

$$\text{Additional Electricity from AD (kWh)} = \text{Electricity from AD (kWh/t)} \times \text{Amount of Waste (t)} \quad (15)$$

$$\text{Additional Electricity from AD (MWh)} = \frac{\text{Electricity from AD (kWh)}}{1000} \quad (16)$$

$$\text{Additional Electricity from AD (MW)} = \frac{\text{Electricity from AD (MWh)}}{8760\text{h}} \quad (17)$$

**Table S11.** The Electricity generated from 10% variation in conversion efficiency of WtE systems for Abuja and Lagos.

| <b>Electricity Generated (kWh/t)</b> | <b>Abuja</b> | <b>Lagos</b> |
|--------------------------------------|--------------|--------------|
| Anaerobic Digestion                  | 734          | 751          |
| Incineration                         | 485          | 603          |
| Gasification                         | 703          | 688          |
| Landfill Gas to Energy               | 149          | 174          |

**Table S12.** The Additional Electricity from AD to Grid electricity and the Percentage Increase.

| Input Data  |                                             |                                            |                                               |                         |
|-------------|---------------------------------------------|--------------------------------------------|-----------------------------------------------|-------------------------|
|             | Grid Electricity Supply (MW)                | Amount of Waste (Tonnes)                   | Additional Electricity Supply from AD (kWh/t) |                         |
| Abuja       | 229                                         | 156881.8                                   | 667                                           |                         |
| Lagos       | 300                                         | 744072.4                                   | 683                                           |                         |
| Nigeria     | 4000                                        | 32000000                                   | 1350                                          |                         |
| Output Data |                                             |                                            |                                               |                         |
|             | Additional Electricity Supply from AD (kWh) | Additional Electricity Supply from AD (MW) | Total Electricity Supply (MW)                 | Percentage Increase (%) |
| Abuja       | 104640153.1                                 | 12                                         | 241                                           | 5.2                     |
| Lagos       | 744072.4                                    | 58                                         | 358                                           | 19                      |
| Nigeria     | 43200000000                                 | 932                                        | 4932                                          | 23.3                    |

## References

1. Sharma, B. K.; Chandel, M. K. 'Life cycle assessment of potential municipal solid waste management strategies for Mumbai, India'. *Waste Manag. Res.* 2017,35(1), 79–91. doi: 10.1177/0734242X16675683.
2. Odedina, M.J.; Charnnok,B.; Saritpongteeraka, K.; Chaiprapat, S. Effects of size and thermophilic pre-hydrolysis of banana peel during anaerobic digestion, and biomethanation potential of key tropical fruit wastes. *Waste Manage.* 2017, 68, 128–38.
3. Chen, TC, Lin, CF (2010) CO<sub>2</sub> emission from municipal solid waste incinerator: IPCC formula estimation and flue gas measurement. *Journal of Environmental Management* 20: 9–17.
4. Chien, TW, Chu, H (2000) Removal of SO<sub>2</sub> and NO from flue gas by wet scrubbing using an aqueous NaClO<sub>2</sub> solution. *Journal of Hazardous Materials* 80: 43–57.
5. Intergovernmental Panel on Climate Change (2006) 2006 IPCC guidelines for national greenhouse gas inventories, Volume 5. Available at: <http://www.ipcc-nggip.iges.or.jp/public/2006gl/vol5.html> (accessed April 2014).
6. Jakhrani, A. Q.; Rigit, A. R. H; Othman, A.; Samo S. R.; Kamboh, S. A. "Estimation of carbon footprints from diesel generator emissions," 2012 International Conference on Green and Ubiquitous Technology, 2017, pp. 78-81, doi: 10.1109/GUT.2012.6344193.
7. DEFRA., (2007). Department for Environment, Food and Rural Affairs. Incineration of municipal solid waste, waste management technology brief, the new technologies work stream of the Defra Waste Implementation Programme
8. Babu, G.L.S; Lakshmikanthan, P; Santhosh, L.G Life cycle analysis of municipal solid waste (MSW) land disposal options in Bangalore City. In: International Conference on Sustainable Infrastructure. Long Beach; 2014 6–8.
